# Supplementary material for: Cognitive Enhancement Treatment for People With Mental Illness Who Do Not Respond to Supported Employment: A Randomized Controlled Trial
Source: Atypon-hosted journal article supplement (doi:10.1176/appi.ajp.2015.14030374), 2015-05-22
Supplement: appi.ajp.2015.14030374.ds001.pdf [file appi.ajp.2015.14030374.ds001.pdf]

FIGURE S1. CONSORT Flow Diagram for a Study Comparing Enhanced Supported Employment With and Without the Thinking Skills for Work Program

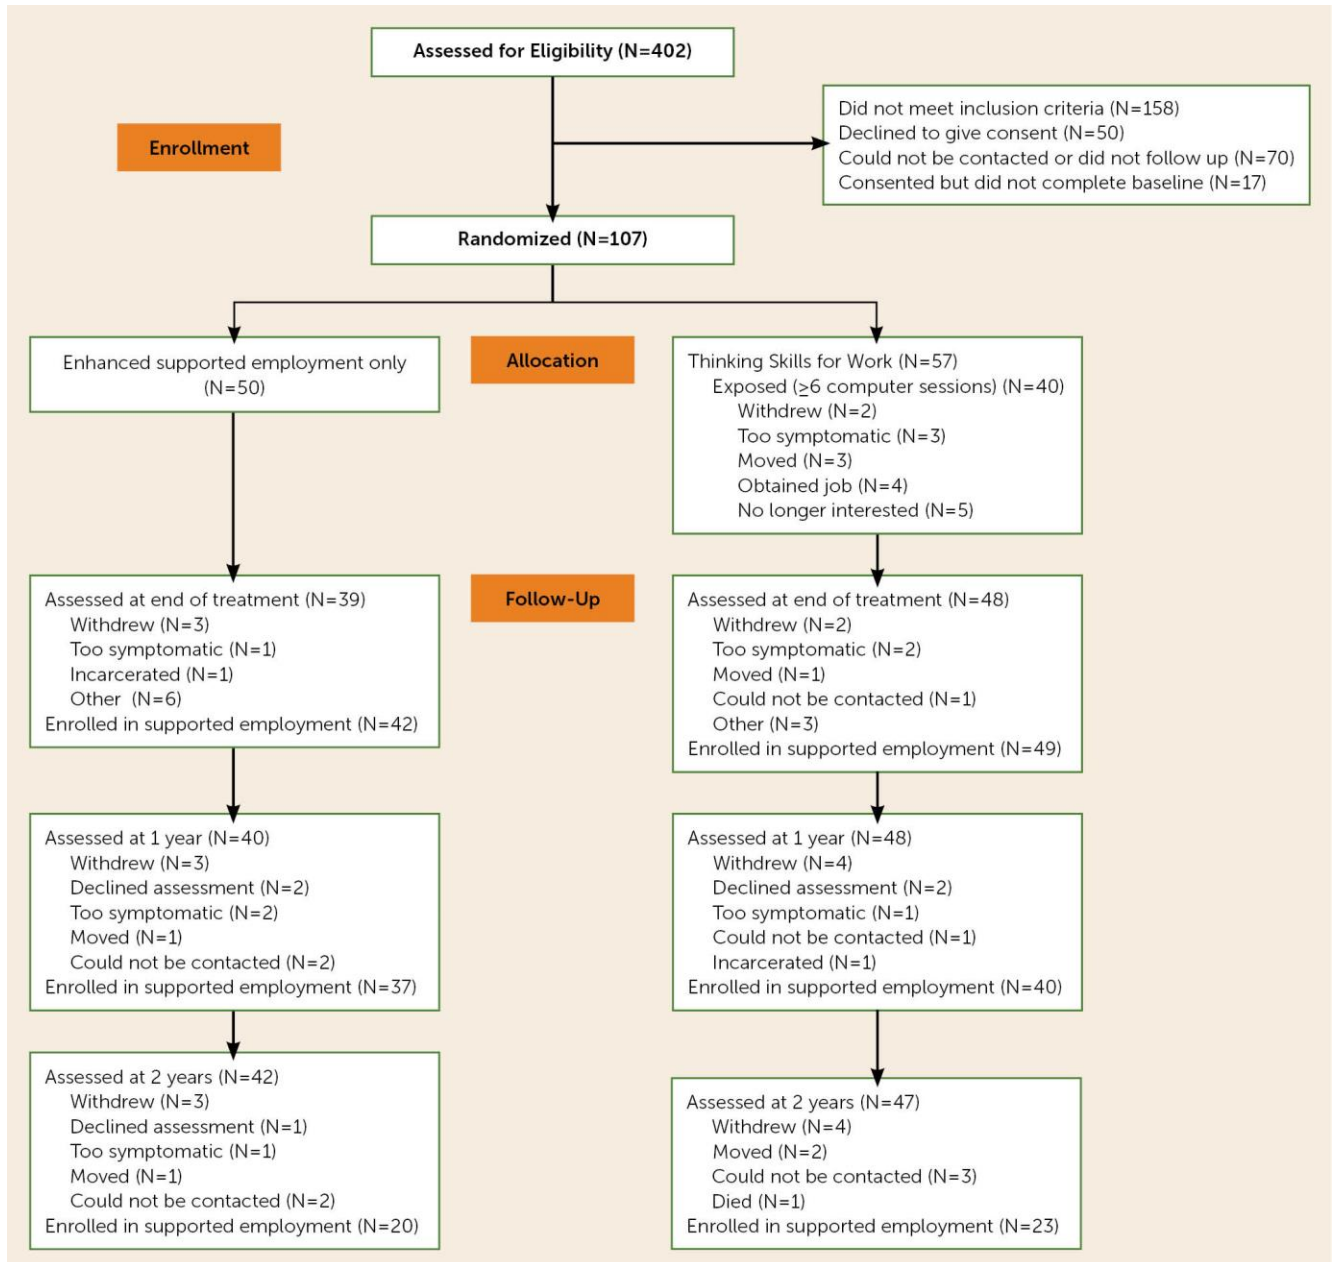

FIGURE S2A. Changes in performance on Category Fluency from baseline to post-treatment and 12- and 24-month follow-ups for participants with schizophrenia or other psychiatric disorders in either the Enhanced Supported Employment only (E-SE) group or the Thinking Skills for Work (TSW) group for the intent-to-treat sample (baseline N=107, post-treatment N=87, 12 months N=86, 24 months N=74).

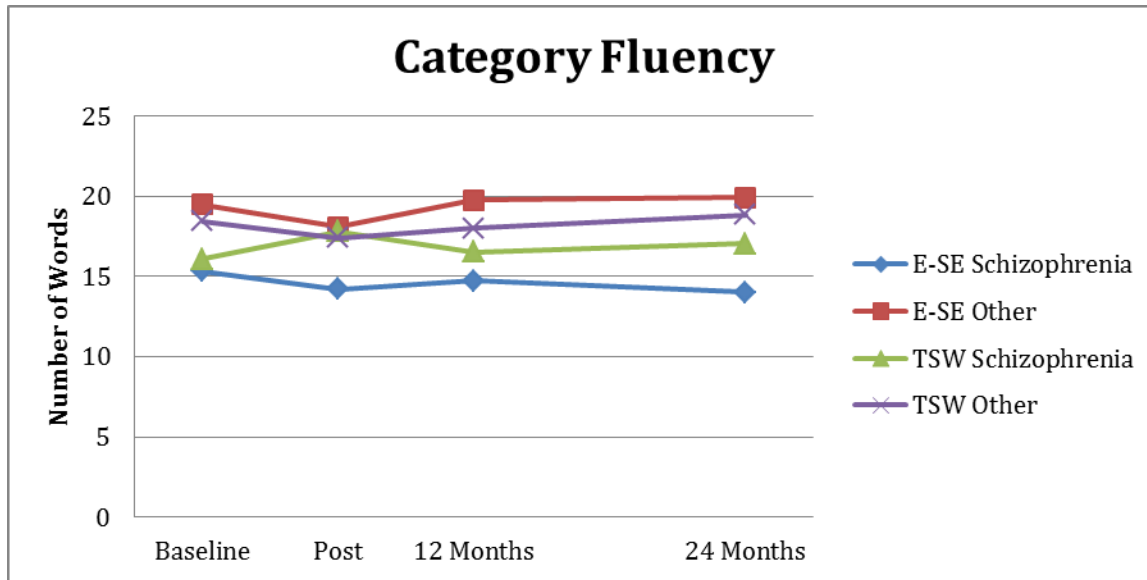

FIGURE S2B. Changes in performance on Continuous Performance Test-Identical Pairs from baseline to post-treatment and 12- and 24-month follow-ups for participants with schizophrenia or other psychiatric disorders in either the Enhanced Supported Employment only (E-SE) group or the Thinking Skills for Work group (TSW) for the intent-to-treat sample (baseline N=105, post-treatment N=86, 12 months N=86, 24 months N=72).

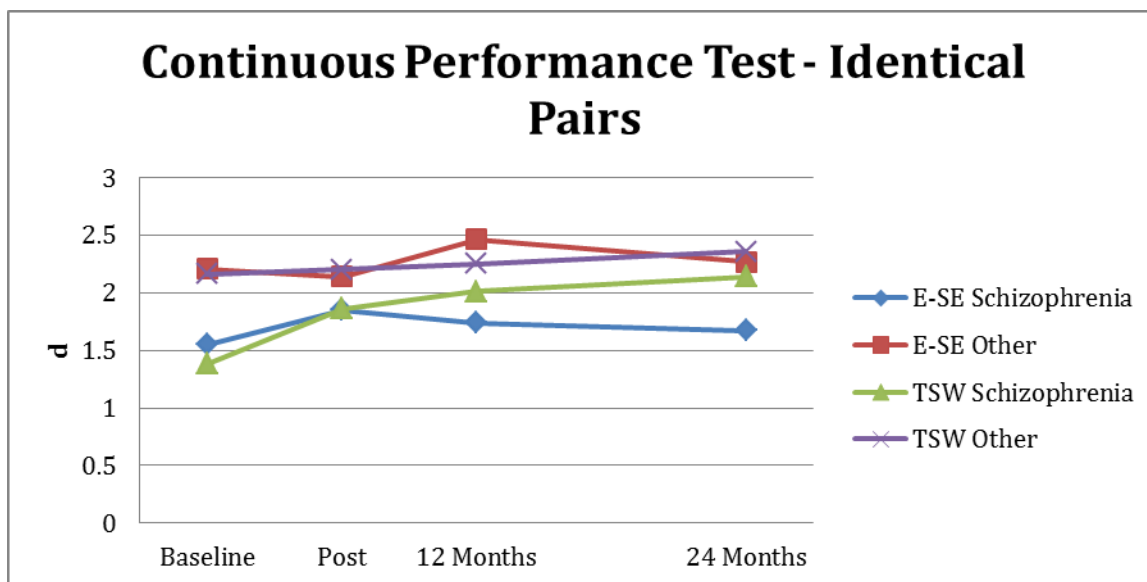

TABLE S1. Summary of Treatment Group Effects (Thinking Skills for Work vs. Enhanced Supported Employment Only) and Group by Diagnosis Interactions for Cognitive Outcomes for Treatment Exposed Sample (N=90).

| Categorical Variables                                           | Treatment Group Effect |       |       |             | Group X Diagnosis Interaction |      |      |
|-----------------------------------------------------------------|------------------------|-------|-------|-------------|-------------------------------|------|------|
|                                                                 | df                     | F     | P     | Effect Size | df                            | F    | P    |
| Composite Cognitive Score                                       | 1,86                   | 15.04 | 0.000 | 0.79        | 1,85                          | 2.44 | 0.12 |
| Trail Making Test A                                             | 1,83                   | 3.03  | 0.08  | -0.16       | 1,82                          | 0.16 | 0.68 |
| Trail Making Test B                                             | 1,82                   | 16.24 | 0.000 | -0.65       | 1,95                          | 2.59 | 0.11 |
| Brief Assessment of Cognition in<br>Schizophrenia Symbol Coding | 1,92                   | 3.26  | 0.07  | 0.28        | 1,91                          | 0.22 | 0.63 |
| Hopkins Verbal Learning Test-Revised -<br>Delayed               | 1,77                   | 3.37  | 0.07  | 0.29        | 1,76                          | 0.52 | 0.47 |
| Hopkins Verbal Learning Test-Revised -<br>Sum 1-3               | 1,99                   | 1.69  | 0.19  | 0.20        | 1,97                          | 0.69 | 0.40 |
| Spatial Span                                                    | 1,83                   | 0.12  | 0.72  | 0.12        | 1,82                          | 1.64 | 0.20 |
| Letter Number Span                                              | 1,84                   | 1.30  | 0.25  | 0.15        | 1,83                          | 4.80 | 0.03 |
| Mazes Test (Neuropsychological<br>Assessment Battery)           | 1,78                   | 0.17  | 0.67  | 0.26        | 1,78                          | 1.27 | 0.26 |
| Brief Visuospatial Memory Test-Revised -<br>Delayed Recall      | 1,80                   | 3.86  | 0.05  | 0.57        | 1,79                          | 0.02 | 0.96 |
| Brief Visuospatial Memory Test-Revised -<br>Total Trials 1-3    | 1,81                   | 8.80  | 0.004 | 0.68        | 1,81                          | 1.80 | 0.18 |
| Category Fluency                                                | 1,74                   | 1.20  | 0.27  | 0.11        | 1,74                          | 5.89 | 0.01 |
| Mayer-Salovey-Caruso Emotional<br>Intelligence Test             | 1,79                   | 0.65  | 0.42  | 0.07        | 1,78                          | 2.45 | 0.12 |
| Continuous Performance Test-Identical<br>Pairs Mean             | 1,83                   | 4.46  | 0.03  | 0.30        | 1,82                          | 6.21 | 0.01 |

TABLE S2. Descriptive Statistics for Cognitive Outcomes for Thinking Skills for Work and Enhanced Supported Employment Only Groups for Intent-to-Treat Sample at Baseline, Post-Treatment, and 12- and 24-Month Follow-Up Assessments (N=107).

| Cognitive Variable                                           | Treatment Group                    | Baseline |        | Post-Treatment |        | 12-Month |        | 24-Month |        |
|--------------------------------------------------------------|------------------------------------|----------|--------|----------------|--------|----------|--------|----------|--------|
|                                                              |                                    | Mean     | SD     | Mean           | SD     | Mean     | SD     | Mean     | SD     |
| Composite Cognitive Score                                    | Enhanced Supported Employment only | 0.05     | 0.78   | -0.03          | 0.75   | -0.04    | 0.78   | -0.19    | 0.90   |
|                                                              | Thinking Skills for Work           | -0.03    | 0.73   | 0.02           | 0.68   | 0.07     | 0.72   | 0.053    | 0.72   |
| Trail Making Test A                                          | Enhanced Supported Employment only | 49.32    | 29.59  | 52.26          | 45.62  | 45.18    | 25.96  | 52.14    | 51.34  |
|                                                              | Thinking Skills for Work           | 47.25    | 35.91  | 44.94          | 26.33  | 42.92    | 25.09  | 41.22    | 23.81  |
| Trail Making Test B                                          | Enhanced Supported Employment only | 161.59   | 135.64 | 165.42         | 130.36 | 180.84   | 134.70 | 221.76   | 165.21 |
|                                                              | Thinking Skills for Work           | 182.89   | 152.16 | 120.38         | 96.33  | 121.42   | 97.97  | 142.29   | 127.36 |
| Brief Assessment of Cognition in Schizophrenia Symbol Coding | Enhanced Supported Employment only | 38.06    | 13.14  | 37.38          | 12.03  | 36.92    | 13.67  | 35.03    | 14.34  |
|                                                              | Thinking Skills for Work           | 38.28    | 10.13  | 39.30          | 11.37  | 38.94    | 11.14  | 39.33    | 12.45  |
| Hopkins Verbal Learning Test-Revised - Delayed               | Enhanced Supported Employment only | 6.94     | 2.82   | 7.10           | 2.52   | 7.21     | 2.76   | 6.34     | 3.52   |
|                                                              | Thinking Skills for Work           | 6.75     | 2.91   | 7.23           | 3.10   | 7.63     | 2.91   | 7.39     | 3.17   |
| Hopkins Verbal Learning Test-Revised - Sum 1-3               | Enhanced Supported Employment only | 20.64    | 5.76   | 21.87          | 5.52   | 22.13    | 5.90   | 20.62    | 6.84   |
|                                                              | Thinking Skills for Work           | 20.44    | 5.70   | 21.83          | 6.60   | 23.27    | 7.81   | 22.09    | 6.33   |
| Spatial Span                                                 | Enhanced Supported Employment only | 13.48    | 3.95   | 14.10          | 3.85   | 13.76    | 4.01   | 13.00    | 4.42   |
|                                                              | Thinking Skills for Work           | 12.30    | 3.99   | 13.16          | 4.00   | 13.02    | 4.02   | 13.09    | 4.47   |
| Letter Number Span                                           | Enhanced Supported Employment only | 11.74    | 5.04   | 12.08          | 4.94   | 11.53    | 4.76   | 11.24    | 5.92   |
|                                                              | Thinking Skills for Work           | 11.68    | 4.68   | 12.77          | 4.97   | 12.58    | 5.12   | 12.42    | 5.02   |
| Mazes Test (Neuropsychological Assessment Battery)           | Enhanced Supported Employment only | 11.72    | 8.01   | 11.03          | 7.39   | 11.76    | 7.52   | 10.34    | 7.76   |
|                                                              | Thinking Skills for Work           | 9.98     | 6.73   | 8.96           | 5.32   | 10.72    | 6.00   | 10.87    | 6.67   |
| Brief Visuospatial Memory Test-Revised - Delayed Recall      | Enhanced Supported Employment only | 6.67     | 3.54   | 6.97           | 4.46   | 5.78     | 3.36   | 5.07     | 3.19   |
|                                                              | Thinking Skills for Work           | 5.42     | 3.08   | 6.30           | 3.07   | 6.09     | 3.11   | 5.73     | 2.87   |
| Brief Visuospatial Memory Test - Revised - Total Trials 1-3  | Enhanced Supported Employment only | 16.37    | 8.25   | 15.77          | 8.25   | 15.11    | 6.73   | 14.86    | 7.27   |
|                                                              | Thinking Skills for Work           | 13.82    | 8.21   | 16.67          | 8.49   | 16.17    | 8.03   | 15.47    | 7.04   |
| Category Fluency                                             | Enhanced Supported Employment only | 17.50    | 5.20   | 16.31          | 6.49   | 16.97    | 6.04   | 17.07    | 6.40   |
|                                                              | Thinking Skills for Work           | 17.40    | 6.01   | 17.56          | 6.43   | 17.42    | 5.59   | 18.09    | 5.40   |
| Mayer-Salovey-Caruso Emotional Intelligence Test             | Enhanced Supported Employment only | 87.67    | 11.48  | 88.26          | 11.61  | 86.33    | 11.01  | 87.39    | 11.38  |
|                                                              | Thinking Skills for Work           | 89.29    | 10.61  | 89.69          | 10.87  | 90.15    | 11.64  | 91.07    | 11.66  |
| Continuous Performance Test-Identical Pairs Mean             | Enhanced Supported Employment only | 1.90     | 0.82   | 2.01           | 0.81   | 2.06     | 0.89   | 2.00     | 0.90   |
|                                                              | Thinking Skills for Work           | 1.82     | 0.90   | 2.06           | 0.99   | 2.15     | 0.92   | 2.26     | 0.95   |

TABLE S3. Descriptive Statistics for Cognitive Outcomes for Thinking Skills for Work and Enhanced Supported Employment Only Groups for Treatment Exposed Sample at Baseline, Post-Treatment, and 12- and 24-Month Follow-Up Assessments (N=90).

| Cognitive Variable                                           | Treatment Group                    | Baseline |        | Post-Treatment |        | 12-Month |        | 24-Month |        |
|--------------------------------------------------------------|------------------------------------|----------|--------|----------------|--------|----------|--------|----------|--------|
|                                                              |                                    | Mean     | SD     | Mean           | SD     | Mean     | SD     | Mean     | SD     |
| Composite Cognitive Score                                    | Enhanced Supported Employment only | 0.50     | 0.78   | -0.03          | 0.75   | -0.04    | 0.78   | -0.19    | 0.90   |
|                                                              | Thinking Skills for Work           | -0.02    | 0.63   | 0.98           | 0.55   | 0.16     | 0.58   | 0.17     | 0.55   |
| Trail Making Test A                                          | Enhanced Supported Employment only | 49.32    | 29.59  | 52.26          | 45.62  | 45.18    | 25.96  | 52.14    | 51.34  |
|                                                              | Thinking Skills for Work           | 46.08    | 21.69  | 41.56          | 15.75  | 39.29    | 14.71  | 37.54    | 12.66  |
| Trail Making Test B                                          | Enhanced Supported Employment only | 161.59   | 135.64 | 165.42         | 130.36 | 180.84   | 134.70 | 221.76   | 165.21 |
|                                                              | Thinking Skills for Work           | 186.70   | 155.50 | 102.24         | 52.14  | 101.68   | 48.75  | 118.54   | 91.80  |
| Brief Assessment of Cognition in Schizophrenia Symbol Coding | Enhanced Supported Employment only | 38.06    | 13.14  | 37.38          | 12.03  | 36.92    | 13.67  | 35.03    | 14.34  |
|                                                              | Thinking Skills for Work           | 38.40    | 9.90   | 40.38          | 10.96  | 40.05    | 10.58  | 41.37    | 11.84  |
| Hopkins Verbal Learning Test-Revised - Delayed               | Enhanced Supported Employment only | 6.94     | 2.82   | 7.10           | 2.521  | 7.21     | 2.76   | 6.34     | 3.58   |
|                                                              | Thinking Skills for Work           | 6.85     | 2.74   | 7.47           | 2.88   | 8.03     | 2.57   | 7.68     | 2.99   |
| Hopkins Verbal Learning Test-Revised - Sum 1-3               | Enhanced Supported Employment only | 20.64    | 5.76   | 21.87          | 5.52   | 22.13    | 5.90   | 20.62    | 6.84   |
|                                                              | Thinking Skills for Work           | 20.65    | 5.00   | 22.42          | 5.86   | 24.16    | 7.62   | 23.17    | 5.61   |
| Spatial Span                                                 | Enhanced Supported Employment only | 13.48    | 3.95   | 14.10          | 3.85   | 13.76    | 4.01   | 13.00    | 4.42   |
|                                                              | Thinking Skills for Work           | 12.35    | 3.80   | 13.26          | 3.93   | 13.13    | 3.78   | 13.46    | 3.98   |
| Letter Number Span                                           | Enhanced Supported Employment only | 11.74    | 5.04   | 12.08          | 4.94   | 11.53    | 4.76   | 11.24    | 5.92   |
|                                                              | Thinking Skills for Work           | 12.05    | 4.33   | 13.21          | 4.53   | 12.76    | 4.71   | 13.20    | 4.19   |
| Mazes Test (Neuropsychological Assessment Battery)           | Enhanced Supported Employment only | 11.72    | 8.01   | 11.03          | 7.39   | 11.76    | 7.52   | 10.34    | 7.76   |
|                                                              | Thinking Skills for Work           | 9.05     | 6.18   | 8.78           | 4.78   | 10.92    | 5.85   | 11.29    | 6.46   |
| Brief Visuospatial Memory Test-Revised - Delayed Recall      | Enhanced Supported Employment only | 6.67     | 3.54   | 6.97           | 4.46   | 5.78     | 3.36   | 5.07     | 3.19   |
|                                                              | Thinking Skills for Work           | 5.33     | 2.90   | 6.55           | 2.93   | 6.38     | 2.77   | 6.03     | 2.64   |
| Brief Visuospatial Memory Test-Revised - Total Trials 1-3    | Enhanced Supported Employment only | 16.37    | 8.25   | 15.77          | 8.25   | 15.11    | 6.73   | 14.86    | 7.27   |
|                                                              | Thinking Skills for Work           | 13.75    | 7.97   | 17.36          | 8.24   | 16.84    | 6.98   | 16.54    | 6.39   |
| Category Fluency                                             | Enhanced Supported Employment only | 17.50    | 5.20   | 16.31          | 6.49   | 16.97    | 6.04   | 17.07    | 6.40   |
|                                                              | Thinking Skills for Work           | 17.93    | 6.17   | 18.15          | 6.35   | 17.87    | 5.48   | 18.60    | 5.37   |
| Mayer-Salovey-Caruso Emotional Intelligence Test             | Enhanced Supported Employment only | 87.67    | 11.48  | 88.26          | 11.61  | 86.33    | 11.01  | 87.39    | 11.38  |
| Continuous Performance Test-Identical Pairs Mean             | Thinking Skills for Work           | 89.31    | 10.12  | 90.24          | 10.58  | 90.85    | 10.43  | 91.10    | 10.83  |
|                                                              | Enhanced Supported Employment only | 1.90     | 0.82   | 2.00           | 0.81   | 2.06     | 0.89   | 2.00     | 0.90   |
|                                                              | Thinking Skills for Work           | 1.86     | 0.87   | 2.12           | 0.84   | 2.20     | 0.82   | 2.42     | 0.75   |
